# Supplementary material
Source: publisher figshare collection journal article supplement (https://asha.figshare.com/articles/dataset/_/25222094)
Supplement: Supplementary file 1 [file 1]

**Supplemental Material S4.** Likelihood ratio tests results predicting production of SG elements.

| <b>SG</b>               | <b>AIC</b> | <b>BIC</b> | <b>logLik</b> | <b>deviance</b> | <b>Chi sq</b> | <b>df</b> | <b>p</b>         |
|-------------------------|------------|------------|---------------|-----------------|---------------|-----------|------------------|
| SG                      | 1735.30    | 1767.00    | -861.67       | 1723.30         | 211.96        | 4         | <b>&lt; .001</b> |
| Episode                 | 1668.80    | 1716.30    | -825.40       | 1650.80         | 72.54         | 3         | <b>&lt; .001</b> |
| Language                | 1662.50    | 1715.30    | -821.26       | 1642.50         | 8.28          | 1         | <b>.004</b>      |
| SG × Episode            | 1612.40    | 1728.60    | -784.18       | 1568.40         | 74.15         | 12        | <b>&lt; .001</b> |
| SG × Language           | 1618.10    | 1755.50    | -783.07       | 1566.10         | 2.23          | 4         | .69              |
| SG × Episode × Language | 1618.10    | 1834.70    | -768.07       | 1536.10         | 29.99         | 15        | <b>.01</b>       |
| Age                     | 1615.70    | 1837.60    | -765.87       | 1531.70         | 4.40          | 1         | <b>.03</b>       |
