# Supplementary material
Source: publisher figshare collection journal article supplement (https://asha.figshare.com/articles/dataset/_/25222094)
Supplement: Supplementary file 2 [file 1]

**Supplemental Material S1.** Likelihood ratio tests results predicting total macrostructure score.

|                  | <b>AIC</b> | <b>BIC</b> | <b>logLik</b> | <b>deviance</b> |       | <b>Chi sq</b> | <b>df</b>         | <b>p</b> |
|------------------|------------|------------|---------------|-----------------|-------|---------------|-------------------|----------|
| Story            | -51.91     | -40.00     | 29.96         | -59.91          | 20.49 | 1             | <b>&lt; 0.001</b> |          |
| Language         | -58.58     | -43.70     | 34.29         | -68.58          | 8.67  | 1             | <b>0.003</b>      |          |
| Story × Language | -59.93     | -42.07     | 35.97         | -71.93          | 3.35  | 1             | 0.07              |          |
| Age              | -61.35     | -43.49     | 36.68         | -73.35          | 4.77  | 1             | <b>0.02</b>       |          |
| AoB              | -59.35     | -38.52     | 36.68         | -73.35          | 0.00  | 1             | 0.96              |          |
| Proficiency      | -57.51     | -33.70     | 36.76         | -73.51          |       | 0.16          | 1                 | .69      |
