# Supplementary material
Source: publisher figshare collection journal article supplement (https://asha.figshare.com/articles/dataset/_/25222094)
Supplement: Supplementary file 3 [file 1]

**Supplemental Material S2.** Likelihood ratio tests results predicting macrostructure score per episode.

| <b>Episode</b>     | <b>AIC</b> | <b>BIC</b> | <b>logLik</b> | <b>deviance</b> | <b>Chi sq</b> | <b>df</b> | <b>p</b>         |
|--------------------|------------|------------|---------------|-----------------|---------------|-----------|------------------|
| Episode            | -70.44     | -48.40     | 41.22         | -82.44          | 63.95         | 3         | <b>&lt; .001</b> |
| Language           | -76.48     | -50.77     | 45.24         | -90.48          | 8.04          | 1         | <b>.005</b>      |
| Episode x Language | -75.89     | -39.16     | 47.95         | -95.89          | 5.41          | 3         | .14              |
| Age                | -78.94     | -49.56     | 47.47         | -94.94          | 4.46          | 1         | <b>.03</b>       |
