# Supplementary material
Source: publisher figshare collection journal article supplement (https://asha.figshare.com/articles/dataset/_/25222094)
Supplement: Supplementary file 4 [file 1]

**Supplemental Material S3.** Likelihood ratio tests results predicting full GAO.

| <b>GAO</b>     | <b>AIC</b> | <b>BIC</b> | <b>logLik</b> | <b>deviance</b> | <b>Chi sq</b> | <b>df</b> | <b>p</b>         |
|----------------|------------|------------|---------------|-----------------|---------------|-----------|------------------|
| GAO            | 209.77     | 228.13     | -99.88        | 199.77          | 21.93         | 3         | <b>&lt; .001</b> |
| Language       | 206.93     | 228.97     | -97.47        | 194.93          | 4.83          | 1         | <b>.03</b>       |
| GAO × Language | 209.97     | 243.03     | -95.99        | 191.97          | 2.96          | 3         | .39              |
| Age            | 206.12     | 231.84     | -96.06        | 192.12          | 2.81          | 1         | .09              |
